# Supplementary material
Source: PubMed Central journal article supplement (PMC3360944)

# Supplemental Figure 1

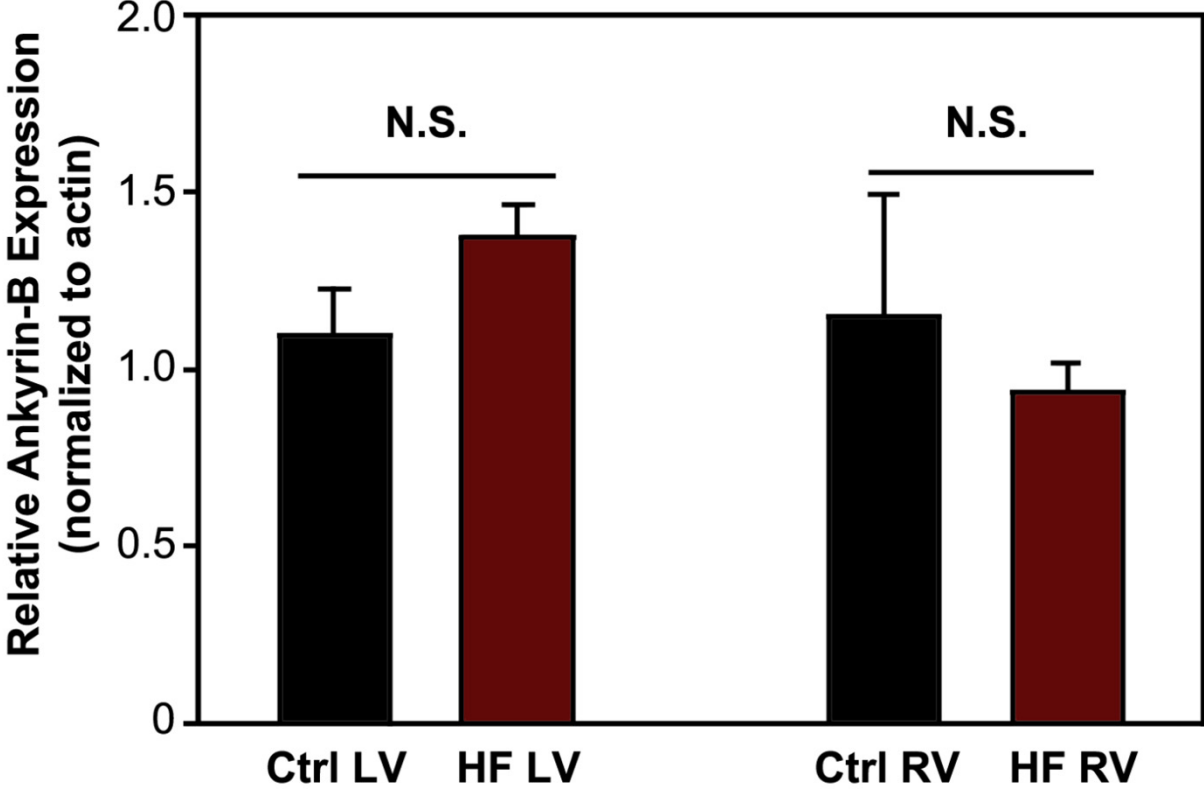

# Supplemental Figure 2

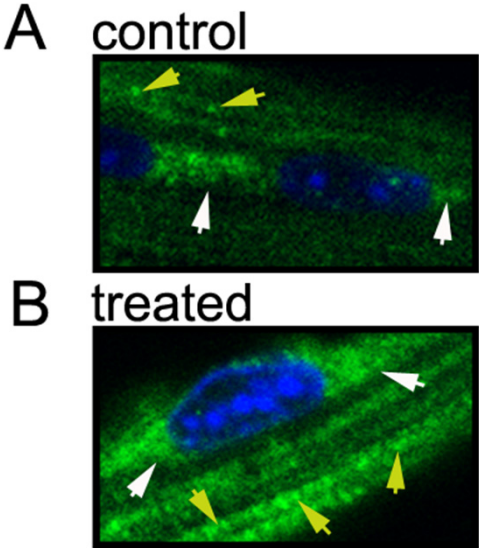

# Supplemental Figure 3

**A**

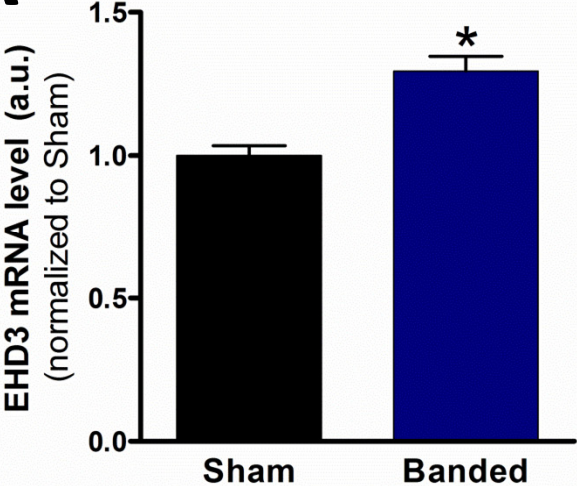

**B**

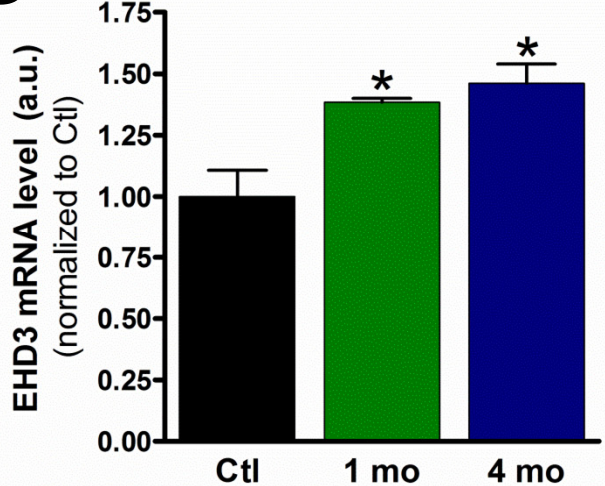

Supplement: NIHMS366231-supplement-02.pdf [file NIHMS366231-supplement-02.pdf]
